# Pollinator specialization imposes stronger evolutionary constraints on flower shape

Simon Joly<sup>1,2,\*</sup>, François Lambert<sup>2</sup>, Hermine Alexandre<sup>2</sup>, Étienne Léveillé-Bourret<sup>2,\*\*</sup>, and John L. Clark<sup>3</sup>

<sup>1</sup>*Montreal Botanical Garden, Montréal, Canada*

<sup>2</sup>*Institut de recherche en biologie végétale, Département de sciences biologiques, Université de Montréal, Montréal, Canada*

<sup>3</sup>*Department of Biological Sciences, The University of Alabama, Tuscaloosa, USA*

\* *To whom correspondance should be addressed: Institut de recherche en biologie végétale, 4101 Sherbrooke East, Montréal (QC) H1X 2B2, Canada; +1 514.872.0344; joly.simon@gmail.com.*

\*\* *Present address: Department of Biology, University of Ottawa*

## Abstract

Flowers show an unrivalled diversity as reproductive organs but the evolutionary forces underlying this diversity are still poorly understood. In animal-pollinated species, flower shape is fashioned by selection imposed by pollinators, which is expected to vary according to specific guilds of effective pollinators. Using the Antillean subtribe Gesneriinae (Gesneriaceae), we tested the hypothesis that the corolla shapes of specialists effectively pollinated by one functional type of pollinator have maintained more similar shapes through time due to stronger selection constraints than those of species effectively pollinated by more than one functional type of pollinator. Using geometric morphometrics, we show that corolla shape can differentiate hummingbird specialists, bat specialists, and species with a mixed-pollination strategy (pollinated by hummingbirds, bats, and occasionally insects). Then, using evolutionary models, we show that the corolla shape of hummingbird specialists has been evolving under balancing selection, whereas a neutral model of evolution was favoured for mixed-pollination species. This suggests that the corolla shape of pollination specialists remains more similar over macro-evolutionary periods of time to remain fitted to their pollinators. In contrast, corollas of species with a mixed-pollination and thus more generalized strategy vary more, potentially because they experience effective pollination over a wider corolla shape space.

**Key-words:** Pollination syndromes, specialists-generalists, geometric morphometrics, phylogenetic comparative methods, Ornstein-Uhlenbeck (OU) models, balancing selection.

## 1 Introduction

2 The astonishing diversity of shape and colour of angiosperm flowers are a great demonstration  
3 of the role of natural selection in modelling the morphology of organisms. This diversity is  
4 often attributed to zoophilous pollination that provides a wealth of reproduction strategies  
5 (Stebbins, 1970), but we still know little of the underlying evolutionary forces (Waser, 1998).  
6 An important step towards understanding floral diversity is to characterize and quantify the  
7 evolutionary forces acting on floral characters (Rosas-Guerrero et al., 2014).

8 In animal-pollinated species, flowers are fashioned by selection imposed by pollinators,  
9 which is expected to vary according to the guild of effective pollinators (Faegri and van der  
10 Pijl, 1979; Fenster et al., 2004; Rosas-Guerrero et al., 2014). In this context, a useful concept  
11 is that of pollination syndrome, which represents the combination of pollinator-related traits  
12 to which flowers of different species pollinated by functionally similar pollinators converge  
13 (Faegri and van der Pijl, 1979; Fenster et al., 2004; Rosas-Guerrero et al., 2014). For instance,  
14 hummingbird pollinated flowers typically have red flowers with a tube-shaped corolla (Fenster  
15 et al., 2004). Although this concept has sometimes been disputed (e.g., Ollerton et al.,  
16 2009), it generally holds when applied to groups of functionally equivalent pollinators (Rosas-  
17 Guerrero et al., 2014). Pollination syndromes imply that floral evolution is the result of  
18 natural selection that acts to enhance pollen deposition on the stigmatic surface of conspecific  
19 flowers (Martén-Rodríguez et al., 2009). As such, floral traits should be driven primarily  
20 by the most effective pollinators (Stebbins, 1970) and potentially also by counter-effective  
21 pollinators via trade-off effects (Aigner, 2001; Armbruster, 2014).

22 Flower traits involved in pollination are often conveniently classified as "attractive" traits  
23 (Ashman and Morgan, 2004) or "mechanical fit" traits (Cresswell, 1998). Attractive traits are  
24 those involved in pollinator attraction such as flower colour, nectar volume and composition,  
25 and fragrance. In contrast, mechanical fit traits mostly consist of flower shape traits and  
26 are thought to be mostly associated with the transfer of the pollen to the stigma. These  
27 mechanical fit traits are expected to be particularly affected by pollinators as selection is  
28 expected to favour traits that have the highest overall fitness for a given guild of pollinators  
29 (Aigner, 2001).

30 The consequences of pollinator-imposed selection on flower shape are easy to predict on  
31 specialist flowers that are pollinated by one species, or by a functional equivalent set of  
32 pollinators. That is, flower shape of specialist flowers should show evidence of balancing

33 selection around an optimal shape adapted to its functional pollinators. In contrast, the  
34 expectations of selective pressure on flower shape are less clear for generalist flowers that can  
35 be effectively pollinated by several pollinators (Aigner, 2001; Sahli and Conner, 2011). In  
36 general, unless the different functional pollinators all select for a common shape (common  
37 peak model: Sahli and Conner, 2011), generalists effectively pollinated by more than one  
38 functional type of pollinators are expected to be under weaker selection pressure (Johnson  
39 and Steiner, 2000) than specialists.

40 This prediction does not seem to have been tested thoroughly even if these questions  
41 are important to understand how and why flowers diversify under the selection of animal  
42 pollinators (Johnson, 2010). Insights on these questions are likely to be gained through both  
43 microevolutionary and macroevolutionary approaches (Johnson, 2010). There is considerable  
44 evidence that traits involved in the mechanical fit between the flower and the pollinators are  
45 under stronger selective pressure as they show less variation in populations (e.g., Muchhala,  
46 2006; Cresswell, 1998) and because their parts show greater integration (Ashman and Majetic,  
47 2006). There is also much evidence that flower shape of both specialist and generalist flowers  
48 is affected by the relative abundance of their pollinators over their species ranges (e.g., Gómez  
49 and Perfectti, 2010; Newman et al., 2014; Niet et al., 2014; Martén-Rodríguez et al., 2011)  
50 and at the macroevolutionary level (e.g., Gómez et al., 2015). However, few studies have  
51 contrasted the selective forces acting on flowers for different levels of pollination generalization  
52 for a given group of plants.

53 In this study, we use a macroevolutionary approach to test whether increased specialism  
54 in pollination is associated with a stronger selection pressure on corolla shapes of species  
55 of the subtribe Gesneriinae of the Gesneriaceae family in the Caribbean islands. The re-  
56 cent development of powerful phylogenetic comparative methods allow estimating historic  
57 selection pressures on large groups of species (Beaulieu et al., 2012; Butler and King, 2004)  
58 and thus testing specific hypotheses regarding the role of pollinators on floral trait evolution  
59 (e.g., Gómez et al., 2015). The subtribe Gesneriinae represents an ideal group to test this  
60 hypothesis. This diverse group in terms of floral morphologies is almost completely endemic  
61 to the Antilles and diversified into approximately 81 species (Skog, 2012) during the last  
62 10 millions years (Roalson et al., 2008). With one exception, the species can be classified  
63 into three main pollination syndromes: hummingbird specialists, bat specialists, and species  
64 with a mixed-pollination strategy. Species of the latter category are effectively pollinated  
65 by combinations of hummingbirds, bats and, occasionally, insects (Martén-Rodríguez and  
66 Fenster, 2008; Martén-Rodríguez et al., 2009, 2010). Although these are probably not true  
67 generalists, they are nevertheless less specialized than species of syndromes adapted to a  
68 single functional set of pollinators. A phylogenetic study of the group has suggested that  
69 the hummingbird syndrome is probably the ancestral state in the group and that there has

70 been multiple shifts towards bat and mixed-pollination strategies (Martén-Rodríguez et al.,  
71 2010). In this study, we use evolutionary models and geometric morphometrics to test (1) if  
72 flower shape as characterized by geometric morphometrics can distinguish the different polli-  
73 nation syndromes, and (2) if specialists evolved under stronger balancing selection compared  
74 to mixed-pollination species.

## 75 **Material and Methods**

### 76 **Floral morphology and pollination syndromes**

77 We took photographs of 137 flowers in anthesis (137 distinct individuals, all from different  
78 localities) in longitudinal view, from 50 species (supplementary Table S1, S2; picture thumb-  
79 nails are available as supplementary material). Most of these were taken in the wild, but  
80 a few specimens came from botanical gardens. We also photographed three times the same  
81 flower (releasing the flower between each) for four different species at the Montreal Botanical  
82 Garden to quantify potential error in hand-photographed specimens, as this is how most of  
83 the specimens were photographed in the wild.

84 Pollination syndrome information per species were obtained from the literature (Martén-  
85 Rodríguez and Fenster, 2008; Martén-Rodríguez et al., 2009, 2010) and inferred for species  
86 with clear hummingbird and bat syndromes as these syndromes can be predicted perfectly  
87 (Martén-Rodríguez et al., 2009). Because this is not the case for species with a mixed-  
88 pollination syndrome, these were not predicted. Analyses were repeated with only species  
89 with confirmed pollination syndromes. In the Antillean subtribe Gesneriinae, hummingbird  
90 specialists have a tubular corolla with bright colours (yellow, orange or red) and diurnal  
91 anthesis, bat specialists have a campanulate (bell-shaped) corolla of light colours (green or  
92 white) and a nocturnal anthesis, and species with a mixed-pollination strategy are interme-  
93 diate with a subcampanulate corolla (bell-shaped with a basal constriction) showing various  
94 colours with frequent coloured spots, and diurnal as well as nocturnal anther dehiscence and  
95 nectar production (Martén-Rodríguez et al., 2009). We followed the current taxonomy (Skog,  
96 2012), although we consider subspecies *viridiflora*, *sintenisii*, *quisqueyana* and *acrochordo-*  
97 *nanthe* of *Gesneria viridiflora* to be distinct species (F. Lambert et al., unpublished data).  
98 It should be noted that species referred to as having a mixed-pollination syndrome were  
99 previously termed generalists, but we prefer the term mixed-pollination as these species are  
100 generally effectively pollinated by only two functional sets of pollinators.

## 101 Molecular methods

102 A total of 94 specimens were included in the phylogenetic analyses (supplementary Table  
103 S3). The species *Koehleria 'trinidad'* (tribe Gesnerieae) and *Henckelia malayana* (tribe Tri-  
104 chosporeae) were included as outgroups. DNA was extracted using the plant DNA extraction  
105 kits from QIAGEN (Toronto, Ontario) or BioBasics (Markham, Ontario). Five nuclear genes  
106 were amplified and sequenced: *CYCLOIDEA*, *CHI*, *UF3GT*, *F3H*, *GAPDH*. The first four  
107 are unlinked (H. Alexandre, unpublished data), whereas no data is available for *GAPDH*.  
108 Primer sequences and PCR conditions can be found in supplementary Table S4. PCR reac-  
109 tions included 1 × buffer, 1 mM MgSO<sub>4</sub>, 1 U DreamTaq (Thermoscientific), 0.4 μM of each  
110 primer, 0.2 μM of each dNTPs, 1% PVP (M.W. 40,000), 50 μg BSA and ca. 30 ng of DNA.  
111 Sequencing reactions were performed by the Genome Quebec Innovation Centre and run on  
112 a 3730xl DNA Analyzer (Applied Biosystems). Sequences from both primers were assembled  
113 into contigs and corrected manually in Geneious vers. 1.8. DNA sequences generated for this  
114 study were augmented with previously published sequences (supplementary Table S3).

## 115 Phylogenetic analyses

116 Gene sequences were aligned using MAFFT (Kato and Standley, 2013). Ambiguous align-  
117 ment regions in *CHI* and *GAPDH* due to introns were removed using gblocks (Castresana,  
118 2000) with the default settings. Alignments were verified by eye and no obviously misaligned  
119 region remained after treatment with gblocks. The best substitution models were selected by  
120 Aikake Information Criterion (AIC) with jModeltest 2 (Darriba et al., 2012) using an opti-  
121 mized maximum likelihood tree. A species tree was reconstructed using \*BEAST in BEAST  
122 vers. 1.8.2 (Drummond et al., 2012). A Yule prior was chosen for the tree, a lognormal  
123 relaxed molecular clock for gene trees, and a gamma (2,1) prior for gene rates. Other pa-  
124 rameters were left to the default settings. Three independent Markov Chain Monte Carlo  
125 (MCMC) analyses of  $1 \times 10^8$  generations were performed and the trees and parameters were  
126 sampled every 10,000 generations. Convergence of the runs was reached for parameter values,  
127 tree topology and clade posterior probabilities. The first  $2 \times 10^7$  generations were discarded  
128 as burnin and the remaining trees were combined for the analyses. The maximum clade  
129 credibility tree with median node heights was used for graphical representation.

## 130 Geometric morphometric analyses

131 Six landmarks and 26 semi-landmarks were positioned on photographs using tpsDig2 (Rohlf,  
132 2010) as in Alexandre et al. (2015). Two landmarks were positioned at the base of the corolla,  
133 two at the tips of the petal lobes, and two at the base of the petal lobes, which generally  
134 corresponds to the corolla tube opening. The semi-landmarks were then positioned at equal

135 distance along the curve of the corolla (13 on each side) between the landmarks at the base of  
136 the corolla and at the base of the petal lobes. The landmark data was imported in R (R core  
137 team, 2014) where it was transformed by generalized Procrustes analysis using the **geomorph**  
138 R package (Adams and Otárola-Castillo, 2013). This analysis translates specimens to the  
139 origin, scales them to unit-centroid size, and rotates them using a least-squares criterion until  
140 the coordinates of corresponding points align as closely as possible (Klingenberg, 2010). The  
141 semi-landmarks on curves were slid along their tangent directions during the superimposition  
142 by minimizing the Procrustes distance between the reference and target specimen (Bookstein,  
143 1997). Size was not considered in the analyses because we were interested in shape and  
144 because a proper scale was not available for all specimens.

145 Each photograph was numerized twice and a Procrustes ANOVA was performed to quan-  
146 tify the variance explained by the technical replicates in the whole dataset. These replicates  
147 were combined for the remaining analyses. We also used a Procrustes ANOVA to quantify  
148 the variation among the replicated photographs of the same flowers; these replicates were  
149 not included in the final analyses. The Procrustes aligned specimens were projected into the  
150 tangent space using Principal Component Analysis (PCA) of the covariance matrix. The  
151 PCA scores represent the shape variables that were used in the following analyses.

152 To characterize the total morphological variation for each pollination syndrome, we es-  
153 timated the distance of the mean corolla shape of each species to the pollinator syndrome  
154 centroid in multivariate space and tested if these distances were different for the different  
155 syndromes. This was done using the **betadisper** function of the **vegan** package in R and the  
156 differences were tested by ANOVA. We also partitioned the variation into intraspecific and  
157 interspecific components for each pollination syndrome using Procrustes ANOVA, reporting  
158 adjusted  $R^2$  values.

## 159 **Phylogenetic comparative analyses**

160 Ancestral pollinators were estimated at all nodes of the phylogeny except for the root as  
161 such estimates are generally unreliable (Gascuel and Steel, 2014). The best transition model  
162 was first selected by AIC with the **geiger** R package. Five models were compared based on  
163 biological relevance: Equal Rate (ER), Symmetric (SYM), All Rates Different (ARD), a 3  
164 rates model where rates differed according to the actual state, and a 2 rates model with a  
165 distinct rate for transitions from hummingbirds to other syndromes. Using the best model,  
166 the joint ancestral state probabilities were estimated using stochastic character mapping  
167 (Huelsenbeck et al., 2003). Two thousand character histories were simulated on the maximum  
168 clade credibility tree using the **phytools** R package. The joint probabilities of observing  
169 each state at each node were then estimated. The number of transitions between states was  
170 counted by attributing to each node the state with maximum joint probability and counting

171 the number of each type of transition on all branches of the phylogeny (except between the  
172 root and its daughter clades). The same approach was also performed on 5000 trees sampled  
173 from the posterior distribution of trees to get credible intervals around the estimates.

174 To test if corolla shape has been evolving under balancing selection, we fitted Brownian  
175 motion (BM) and Ornstein-Uhlenbeck (OU) models on corolla shapes of hummingbird spe-  
176 cialists and species with a mixed-pollination strategy. There were too few bat specialists to  
177 properly estimate the fit of these models. The BM model is a standard null model in evolu-  
178 tionary biology and it assumes that evolution proceeds randomly along the branches of the  
179 tree without any selection pressure. The OU model differs from the BM by the presence of an  
180 optimal shape ( $\theta$ ) and a parameter ( $\alpha$ ) that determines the strength of selection (Butler and  
181 King, 2004). For a single quantitative character  $X$  evolving according to a OU model, the  
182 change in character value over the infinitesimal time interval between  $t$  and  $t + dt$  is defined  
183 as  $dX(t) = \alpha[\theta - X(t)]dt + \sigma dB(t)$ , where  $dB(t)$  is the rate of evolution with parameter  $\sigma$   
184 giving its strength (Butler and King, 2004). For a multivariate definition of the models, see  
185 (Bartoszek et al., 2012). It is easy to see that when  $\alpha = 0$ , the model becomes equivalent to  
186 the BM model:  $dX(t) = \sigma dB(t)$ .

187 Genetic studies of pollination syndrome transitions in *Rhytidophyllum* (Gesneriaceae;  
188 Alexandre et al., 2015) and in other species (reviewed in Galliot et al., 2006) suggest that few  
189 genomic regions of moderate importance are generally involved in flower shape modifications.  
190 This suggests that transitions occur rapidly, almost instantaneously in a macro-evolutionary  
191 time frame. Consequently, evolutionary models that fit multiple regimes on a tree (e.g.,  
192 Butler and King, 2004) are not appropriate because they assume that change is gradual. To  
193 circumvent this issue, we used a censored approach (O’Meara et al., 2006) and pruned the  
194 phylogeny to keep only species of a given syndrome at a time, and fitted the BM and OU mod-  
195 els separately for the different syndromes. This approach allows us to focus on the selection  
196 pressures on corolla shape for a given pollination syndrome, that is once the morphological  
197 transition has occurred, and ignore the selection pressure involved in the transitions.

198 We accounted for intraspecific variation when fitting the model by including the standard  
199 error as measurement error for each species (Silvestro et al., 2015). Species without biological  
200 replicates were given the mean standard error of species with the same pollination syndrome.  
201 We also incorporated phylogenetic uncertainty by fitting the models on 5000 randomly sam-  
202 pled species trees from the posterior distribution. For each tree, the BM and OU models  
203 were fitted for hummingbird and mixed-pollination syndrome data and the models were com-  
204 pared by AIC. Replicates for which convergence was not attained were removed. We fitted  
205 the data using univariate and multivariate approaches (i.e., fitting two principal components  
206 simultaneously) using the `mvMORPH` R package (Clavel, 2014). The first two principal compo-  
207 nents of the morphospace, which represent 75 % of the total shape variance, were considered.

208 To further validate the results, we also performed the model comparisons using only species  
209 with confirmed pollinator syndromes and also with species from a single pollination syndrome  
210 origin. The data and scripts used are available as supplementary information.

## 211 Results

### 212 Phylogeny

213 The species phylogeny shows that the genus *Bellonia*, with a bee pollination syndrome  
214 (Martén-Rodríguez et al., 2009), has a basal position in the subtribe and that *Rhytido-*  
215 *phyllum* and *Gesneria* form two distinct clades, although *Gesneria* is less well supported  
216 (Fig. 1). This reinforces the distinction between these two genera, which has been debated  
217 over the years. There is one exception, *Rhytidophyllum bicolor*, which is incorporated in a  
218 molecular phylogeny for the first time and that falls within the *Gesneria* clade, and the sta-  
219 tus of this species will have to be re-evaluated. Several branches show strong clade posterior  
220 probabilities, but some less so due to lack of phylogenetic signal or conflict between genes  
221 trees.

222 The best evolutionary model (smallest AICc) was the two-rates model with one rate for  
223 the transition between either mixed-pollination or bat syndromes to hummingbird, and an-  
224 other from the hummingbird syndrome to either the bat or the mixed-pollination syndromes.  
225 Ancestral state reconstruction by maximum likelihood suggests that the hummingbird syn-  
226 drome is the most likely ancestral state for both *Gesneria* and *Rhytidophyllum*, supporting  
227 previous results that this is the ancestral state in the group (Martén-Rodríguez et al., 2010).  
228 However, because these nodes are deep in the phylogeny, it is difficult to obtain very strong  
229 support for a hummingbird-pollinated ancestor, especially given that *Bellonia spinosa*, the  
230 sister-group, is bee pollinated (not included in the reconstruction). Estimation of the num-  
231 ber of transitions between syndromes supports several transitions between most syndromes,  
232 although the most frequent transitions are from hummingbird to mixed-pollination (4), from  
233 hummingbird to bat (2), and from mixed-pollination to hummingbird (2) (Table 1). These  
234 results support the presence of reversals to the ancestral hummingbird pollination, but not  
235 definitively as the 95% CI includes 0 (Table 1).

### 236 Corolla shape

237 We found that only 0.15% of variation was explained between independent pictures of the  
238 same flower in the replication experiment, which is lower than the variation involved in the  
239 landmark positioning (0.81%). Therefore, we conclude that the error included in the data by  
240 the picture acquisition is minimal. Similarly, the technical replicates (landmark positioning)



241 accounted for only 0.56% of the total variance in the complete dataset. Consequently, the  
242 mean shape per individual was used for the remaining analyses.

243 The projection of the landmarks into the tangent space by mean of PCA, hereafter named  
244 the morphospace, shows that the hummingbird specialists can be differentiated from the  
245 rest of the species using corolla shape (Fig. 2A). These groups are differentiated by the  
246 first principal component that characterizes floral opening (Fig. 2A), which represents the  
247 main characteristic thought to differentiate the hummingbird pollination syndrome from the  
248 bat and the mixed-pollination syndromes (Martén-Rodríguez et al., 2009). The bat and  
249 the mixed-pollination syndromes could not be differentiated with this PCA, but a second  
250 PCA that excluded species with a hummingbird syndrome found that the bat and mixed-  
251 pollination syndrome were somewhat separated along the third principal component (Fig.  
252 2B). The only bat pollinated species that groups with mixed-pollination species on this  
253 axis is *Gesneria quisqueyana* (see supplementary figures S1 and S2 for information on the  
254 individual and species positioning in the PCAs), which, in contrast to other bat pollinated  
255 species in the group, excludes hummingbird during the day by actively closing its flowers  
256 (Martén-Rodríguez et al., 2009). This might explain the odd positioning of this species in the  
257 morphospace. Interestingly, the third principal component that contributes in distinguishing  
258 species with bat and mixed-pollination syndromes is characterized by the presence of a corolla  
259 constriction (Fig. 2B), which generally distinguishes bat pollinated species (that generally  
260 lack the constriction) and species with a mixed-pollination strategy (Martén-Rodríguez et al.,  
261 2009).

## 262 Variation partitioning

263 The pollination syndromes did not have a significantly different corolla variation among  
264 species (ANOVA:  $F = 1.92$ ,  $df = 2$ ,  $p = 0.1654$ ). The partitioning of the shape variance  
265 for the different pollination syndromes showed that the proportion of variance explained  
266 among species corresponded to 81.4% ( $p < 0.001$ ) for hummingbird pollinated species, 91.3%  
267 ( $p = 0.22$ ) for bat pollinated species and 50.4% ( $p < 0.001$ ) for mixed-pollination species.  
268 The result of the variance partitioning for the bat pollinated species would be interpreted  
269 with caution though because there were few replicated individuals within species for this  
270 syndrome.

## 271 Evolutionary models

272 To test if corolla shape has been evolving under balancing selection, we fitted OU and BM  
273 models on the posterior distribution of species trees and compared their fit by *AIC*. Because  
274 a smaller *AIC* value is better, a positive difference in *AIC* between the simpler and the

275 more complex models ( $\Delta AIC = AIC_{BM} - AIC_{OU}$ ) supports the OU model, whereas a  
276 value equal or below 0 supports the simpler BM model. The distribution of  $\Delta AIC$  for  
277 species with a mixed-pollination strategy included 0 in its 95% credible interval (CI) for the  
278 multivariate models (Table 2), thus rejecting the OU model. In contrast, the distribution of  
279  $\Delta AIC$  for hummingbird specialists is positive and the 95% CI excluded 0 in the multivariate  
280 model (Table 2), supporting the OU model and the presence of balancing selection in the  
281 evolution of corolla shape for hummingbird specialists. With the univariate models, the  
282 OU model was rejected for both pollination syndromes for PC1, but as for the multivariate  
283 analyses, the OU model was favoured for PC2 for the hummingbird syndrome but not for  
284 the mixed-pollination syndrome (Table 2). The results were identical when only species  
285 with experimentally confirmed syndromes or from a single evolutionary origin were analyzed  
286 (supplementary Fig. S3).

## 287 Discussion

288 Flowers, as reproductive organs, are more varied than equivalent structures of any other group  
289 of organisms (Barrett, 2002). Although many aspects of the flower are required for assuring  
290 successful reproduction, corolla shape is critical for the adaptation of plants to pollinators.  
291 Pollinators often show an inherent preference for some floral shapes (Gómez et al., 2008)  
292 and can associate shape and reward when these are correlated (Meléndez-Ackerman et al.,  
293 1997), resulting in flower shape being often the target of natural selection. Moreover, it  
294 has been shown that floral shape alone is sufficient to impose an adaptive trade-off between  
295 hummingbird and bat pollination (Muchhala, 2007). Even the corolla shape of generalists  
296 can adapt to particular guilds of pollinators (Gómez and Perfectti, 2010; Gómez et al., 2015).

297 In the Antillean genera *Gesneria* and *Rhytidophyllum*, we were first interested to test  
298 whether pollination syndromes could be identified by corolla shape alone. Pollination syn-  
299 dromes are well characterized and have good predictive value in this group (Martén-Rodríguez  
300 et al., 2009), but previous studies were based on both attractive and mechanical floral char-  
301 acters. Our results based on geometric morphometrics show that it is possible to distinguish  
302 corolla shapes of hummingbird pollinated species, and, although to a lesser degree, the corolla  
303 shapes of species with bat or mixed-pollination syndromes. This supports the concept of  
304 pollination syndromes, especially since all syndromes have more than one origin in the Ges-  
305 nerinae (Fig. 1; Table 1), and it reinforces the evolutionary importance of corolla shape in  
306 this group.

307 It is possible that the analysis of corolla shape using three-dimensional geometric mor-  
308 phometrics (van der Niet et al., 2010) could have allowed a finer characterization of flower  
309 shapes and could have allowed a finer delimitation of pollination syndromes. However, scan-

310 ning flowers in three dimensions requires fresh material, which is not available for the current  
311 group as the vast majority of species are not found in gardens. In lieu of a 3D approach,  
312 the present results show the power of geometric morphometrics for studying floral shapes.  
313 Indeed, geometric morphometric methods are especially insightful for studying the associ-  
314 ations between floral shape variation and pollination biology because they provide better  
315 shape characterization than simple linear measurements and by their capacity to easily sep-  
316 arate size and shape aspects of floral variation (van der Niet et al., 2010). Supporting this,  
317 a recent study on the genetic basis of flower shape variation in *Rhytidophyllum* has shown  
318 that geometric morphometrics allowed a more thorough shape characterization than simple  
319 traits (Alexandre et al., 2015).

## 320 **Selective forces acting on floral shape**

321 We found that the different pollination syndromes had relatively similar overall variation,  
322 a pattern that can be observed when inspecting the dispersion of individuals on the mor-  
323 phospace (Fig. 2A) and confirmed by the distance-based variance analyses including all  
324 shape dimensions. This might be suggestive of similar selective pressure on flower shape for  
325 the different pollination syndromes, but reaching such a conclusion would ignore the distinct  
326 evolutionary histories of the syndromes. Indeed, because the pattern observed amongst liv-  
327 ing species represents the end result of evolution in groups that have diverged for different  
328 amounts of time, it is important to use a phylogenetic approach to quantify selection pressure  
329 at macro-evolutionary scales.

330 Based on previous studies that estimated selection pressures on floral traits for special-  
331 ists and generalists at the intraspecific level (Muchhala, 2006; Gómez and Perfectti, 2010;  
332 Cresswell, 1998), we hypothesized that evidence for balancing selection on flower shape of  
333 specialists might also be detectable at macro-evolutionary scales, and that its strength would  
334 be greater than for species with a mixed-pollination strategy. We used a censored approach to  
335 quantify balancing selection within each pollination syndrome using an Ornstein-Uhlenbeck  
336 (OU) model and tested evidence for selection by comparing this model to a simpler neutral  
337 model of evolution (Brownian motion). The idea behind our approach was to quantify a po-  
338 tential macroevolutionary selective pressure within pollination syndromes that would work  
339 to pull corollas toward an optimal shape, while random mutation processes adds morpholog-  
340 ical variance in the model. Of course, we acknowledge that other types of selection might  
341 have been important as well. For instance, there was certainly directional selection occurring  
342 during pollination syndrome transitions. However, our censored approach should remove the  
343 influence of selection that is acting during pollination syndrome transitions. Selection could  
344 also have shaped floral morphology of some species, either via selection by specific pollinator  
345 species or because of interspecific competition for pollinators. However, these latter selective

346 forces should be (mostly) independent among lineages and thus should not mask the major  
347 macroevolutionary trends.

348 We found a clear support for the OU model for describing the flower shape evolution of  
349 hummingbird pollinated species, which suggests the presence of an optimal corolla shape for  
350 these species and a balancing selection pressure that works to maintain corolla shapes close  
351 to its optimal shape, resulting in a relative morphological stasis in a macro-evolutionary  
352 time frame. In contrast, no such selection pressure could be detected in species with a  
353 mixed-pollination strategy. These findings support our initial hypothesis that specialists are  
354 under stronger selective constraints because they are pollinated by a single functional type  
355 of pollinator. The fact that such balancing selection is not detected for species with a mixed-  
356 pollination strategy suggests that selective constraints on a specific floral shape are perhaps  
357 less important, potentially because their various pollinators allow for a relatively efficient  
358 pollination across a wider shape space.

359 Another possibility that might explain the observed pattern of relaxed selection for species  
360 with a mixed-pollination strategy could be that this category is artificial and might instead  
361 consist of species with some degree of specialization to either hummingbirds or bats. If this  
362 was true, then a pattern of divergent selection within this category could be perceived as  
363 a less constrained evolution. While it is difficult to completely rule out this possibility, the  
364 distinct floral shape of species with mixed-pollination strategies and the fact that it evolved  
365 recurrently argues against such an hypothesis. Moreover, previous pollination studies in the  
366 group suggest that bats or hummingbirds always represent at least 20% of the visits of species  
367 with mixed-pollination strategies (Martén-Rodríguez et al., 2009).

368 It has been suggested that the presence of a constriction at the base of the corolla for  
369 Gesneriinae species with a mixed-pollination strategy could serve to present the nectar to  
370 the bats and guide hummingbirds for them to enter in contact with the reproductive organs  
371 (Martén-Rodríguez et al., 2009). This syndrome might thus represent a good candidate for  
372 floral shape evolution via trade-off effects, where the syndrome shape represents an adap-  
373 tation to pollination by bats and hummingbirds, even though it might not be optimal for  
374 either of these (Aigner, 2001). Under this scenario, the constriction at the base of corollas  
375 with shapes otherwise adapted to bats (wide opening) might allow effective hummingbird  
376 pollination while maintaining bat pollination (Fig. 3). This strategy might be particularly  
377 successful where pollinators are scarce or vary through time, such as in island habitats. This  
378 hypothesis certainly deserves more attention in the future, and will require information on  
379 pollination frequency and efficiency to properly associate flower shape to the relative efficiency  
380 of pollinators.

381 In light of this hypothesis, the rejection of the OU model for species with a mixed-  
382 pollination strategy might not indicate that there are no macro-evolutionary constraints on

383 their flower shapes. Indeed, it is quite likely that the flower shape of zoophilous flowers  
384 are under some sort of balancing selection, and previous studies suggested that sexual floral  
385 traits show less variation than other floral traits (Cresswell, 1998). Instead, it might be that  
386 selective constraints are weaker for the species with mixed-pollination strategies than for  
387 more specialized strategies because of trade-off effects (Fig. 3) and that the small number of  
388 individuals with a mixed-pollination syndrome prevented a significant detection.

389 This study shows that distinct pollinator guilds can have different impacts on flower shape  
390 variation and evolution. In particular, it suggests that plants specialized on a single functional  
391 type of pollinators are likely to be under stronger evolutionary constraints. This study  
392 also helps to understand the apparent paradox between the observed evolutionary lability  
393 of pollination syndromes in angiosperms and the consistency of traits within pollination  
394 syndromes. Indeed, despite the substantial number of transitions (9) in a group of modest  
395 size (81 species), selection acts to stabilize corolla shapes over long periods of time for species  
396 with specialized syndromes. But, above all, these results reinforce Darwin's and Stebbins'  
397 views of the importance of pollinators in shaping floral diversity.

## 398 **Acknowledgements**

399 We thank William Cinea and Phito Merizier that significantly contributed to making this  
400 work possible and Julie Faure for constructive discussions. We also acknowledge the help  
401 of Calcul Québec and the Genome Québec Innovation Centre. This study was financially  
402 supported by the Quebec Centre for Biodiversity Science (QCBS) and the Natural Sciences  
403 and Engineering Research Council (NSERC) of Canada.

## 404 **Data availability**

405 The data, R scripts and .xml files are all available as supplementary material.

## 406 **References**

- 407 Adams, D. C. and E. Otárola-Castillo, 2013. geomorph: an R package for the collection and  
408 analysis of geometric morphometric shape data. *Methods Ecol Evol* 4:393–399.
- 409 Aigner, P. A., 2001. Optimality modeling and fitness trade-offs: when should plants become  
410 pollinator specialists? *Oikos* 95:177–184.
- 411 Alexandre, H., J. Vriinaud, B. Mangin, and S. Joly, 2015. Genetic architecture of pollination

- 412 syndrome transition between hummingbird-specialist and generalist species in the genus  
413 *Rhytidophyllum* (Gesneriaceae). PeerJ 3:e1028.
- 414 Armbruster, W. S., 2014. Floral specialization and angiosperm diversity: phenotypic diver-  
415 gence, fitness trade-offs and realized pollination accuracy. AoB PLANTS 6:plu003.
- 416 Ashman, T.-L. and C. J. Majetic, 2006. Genetic constraints on floral evolution: a review and  
417 evaluation of patterns. Heredity 96:343–352.
- 418 Ashman, T.-L. and M. T. Morgan, 2004. Explaining phenotypic selection on plant attractive  
419 characters: male function, gender balance or ecological context? Proceedings of the Royal  
420 Society of London B: Biological Sciences 271:553–559.
- 421 Barrett, S. C. H., 2002. The evolution of plant sexual diversity. Nature Reviews Genetics  
422 3:274–284.
- 423 Bartoszek, K., J. Pienaar, P. Mostad, S. Andersson, and T. F. Hansen, 2012. A phylogenetic  
424 comparative method for studying multivariate adaptation. Journal of Theoretical Biology  
425 314:204–215.
- 426 Beaulieu, J. M., D.-C. Jhweng, C. Boettiger, and B. C. O’Meara, 2012. Modeling stabiliz-  
427 ing selection: expanding the Ornstein-Uhlenbeck model of adaptive evolution. Evolution  
428 66:2369–2383.
- 429 Bookstein, F. L., 1997. Landmark methods for forms without landmarks: morphometrics of  
430 group differences in outline shape. Medical Image Analysis 1:225–243.
- 431 Butler, M. and A. King, 2004. Phylogenetic comparative analysis: a modeling approach for  
432 adaptive evolution. The American Naturalist 164:683–695.
- 433 Castresana, J., 2000. Selection of conserved blocks from multiple alignments for their use in  
434 phylogenetic analysis. Molecular Biology and Evolution 17:540–552.
- 435 Clavel, J., 2014. mvMORPH: Multivariate comparative tools for fitting evolutionary models  
436 to morphometric data. URL <http://CRAN.R-project.org/package=mvMORPH>. R package  
437 version 1.0.2.
- 438 Cresswell, J. E., 1998. Stabilizing selection and the structural variability of flowers within  
439 species. Ann Bot 81:463–473.
- 440 Darriba, D., G. L. Taboada, R. Doallo, and D. Posada, 2012. jModelTest 2: more models,  
441 new heuristics and parallel computing. Nature Methods 9:772–772.

- 442 Drummond, A. J., M. A. Suchard, D. Xie, and A. Rambaut, 2012. Bayesian phylogenetics  
443 with BEAUti and the BEAST 1.7. *Mol Biol Evol* .
- 444 Faegri, K. and L. van der Pijl, 1979. *The Principles of Pollination Ecology*. Pergamon Press,  
445 Oxford, UK.
- 446 Fenster, C. B., W. S. Armbruster, P. Wilson, M. R. Dudash, and J. D. Thomson, 2004.  
447 Pollination syndromes and floral specialization. *Annu. Rev. Ecol. Evol. Syst.* 35:375–403.
- 448 Galliot, C., J. Stuurman, and C. Kuhlemeier, 2006. The genetic dissection of floral pollination  
449 syndromes. *Curr. Opin. Plant Biol.* 9:78–82.
- 450 Gascuel, O. and M. Steel, 2014. Predicting the ancestral character changes in a tree is  
451 typically easier than predicting the root state. *Syst Biol* 63:421–435.
- 452 Gómez, J. M., J. Bosch, F. Perfectti, J. D. Fernández, M. Abdelaziz, and J. P. M. Camacho,  
453 2008. Spatial variation in selection on corolla shape in a generalist plant is promoted by  
454 the preference patterns of its local pollinators. *Proc. R. Soc. B* 275:2241–2249.
- 455 Gómez, J. M. and F. Perfectti, 2010. Evolution of complex traits: the case of *Erysimum*  
456 corolla shape. *International Journal of Plant Sciences* 171:987–998.
- 457 Gómez, J. M., F. Perfectti, and J. Lorite, 2015. The role of pollinators in floral diversification  
458 in a clade of generalist flowers. *Evolution* 69:863–878.
- 459 Huelsenbeck, J. P., R. Nielsen, and J. P. Bollback, 2003. Stochastic mapping of morphological  
460 characters. *Syst Biol* 52:131–158.
- 461 Johnson, S. D., 2010. The pollination niche and its role in the diversification and maintenance  
462 of the southern African flora. *Philos Trans R Soc Lond B Biol Sci* 365:499–516.
- 463 Johnson, S. D. and K. E. Steiner, 2000. Generalization versus specialization in plant polli-  
464 nation systems. *Trends in Ecology & Evolution* 15:140–143.
- 465 Katoh, K. and D. M. Standley, 2013. MAFFT multiple sequence alignment software version  
466 7: improvements in performance and usability. *Mol Biol Evol* 30:772–780.
- 467 Klingenberg, C. P., 2010. Evolution and development of shape: integrating quantitative  
468 approaches. *Nature Reviews Genetics* 11:623–635.
- 469 Martén-Rodríguez, S., A. Almarales-Castro, and C. B. Fenster, 2009. Evaluation of pollina-  
470 tion syndromes in Antillean Gesneriaceae: evidence for bat, hummingbird and generalized  
471 flowers. *Journal of Ecology* 97:348–359.

- 472 Martén-Rodríguez, S. and C. B. Fenster, 2008. Pollination ecology and breeding systems of  
473 five *Gesneria* species from Puerto Rico. *Ann Bot* 102:23–30.
- 474 Martén-Rodríguez, S., C. B. Fenster, I. Agnarsson, L. E. Skog, and E. A. Zimmer, 2010.  
475 Evolutionary breakdown of pollination specialization in a caribbean plant radiation. *New*  
476 *Phytologist* 188:403–417.
- 477 Martén-Rodríguez, S., W. J. Kress, E. J. Temeles, and E. Meléndez-Ackerman, 2011.  
478 Plant-pollinator interactions and floral convergence in two species of *Heliconia* from the  
479 Caribbean Islands. *Oecologia* 167:1075–1083.
- 480 Meléndez-Ackerman, E., D. R. Campbell, and N. M. Waser, 1997. Hummingbird behavior  
481 and mechanisms of selection on flower color in *Ipomopsis*. *Ecology* 78:2532–2541.
- 482 Muchhala, N., 2006. The pollination biology of *Burmeistera* (Campanulaceae): specialization  
483 and syndromes. *Am. J. Bot.* 93:1081–1089.
- 484 ———, 2007. Adaptive trade-off in floral morphology mediates specialization for flowers  
485 pollinated by bats and hummingbirds. *Am. Nat.* 169:494–504.
- 486 Newman, E., J. Manning, and B. Anderson, 2014. Matching floral and pollinator traits  
487 through guild convergence and pollinator ecotype formation. *Ann Bot* 113:373–384.
- 488 van der Niet, T., C. P. E. Zollikofer, M. S. P. d. León, S. D. Johnson, and H. P. Linder, 2010.  
489 Three-dimensional geometric morphometrics for studying floral shape variation. *Trends in*  
490 *Plant Science* 15:423–426.
- 491 Niet, T. V. d., M. D. Pirie, A. Shuttleworth, S. D. Johnson, and J. J. Midgley, 2014. Do  
492 pollinator distributions underlie the evolution of pollination ecotypes in the Cape shrub  
493 *Erica plukenetii*? *Ann Bot* 113:301–316.
- 494 Ollerton, J., R. Alarcón, N. M. Waser, M. V. Price, S. Watts, L. Cranmer, A. Hingston, C. I.  
495 Peter, and J. Rotenberry, 2009. A global test of the pollination syndrome hypothesis. *Ann*  
496 *Bot* 103:1471–1480.
- 497 O’Meara, B. C., C. Ané, M. J. Sanderson, and P. C. Wainwright, 2006. Testing for different  
498 rates of continuous trait evolution using likelihood. *Evol* 60:922.
- 499 R core team, 2014. R: a language and environment for statistical computing. URL  
500 <http://www.R-project.org>.
- 501 Roalson, E. H., L. E. Skog, and E. A. Zimmer, 2008. Untangling Gloxinieae (Gesneriaceae).  
502 II. Reconstructing biogeographic patterns and estimating divergence times among New  
503 World continental and island lineages. *Systematic Botany* 33:159–175.



- 504 Rohlf, F. J., 2010. TPSDig2, version 2.16. URL  
505 <http://life.bio.sunysb.edu/morph/soft-dataacq.html>.
- 506 Rosas-Guerrero, V., R. Aguilar, S. Martén-Rodríguez, L. Ashworth, M. Lopezaraiza-Mikel,  
507 J. M. Bastida, and M. Quesada, 2014. A quantitative review of pollination syndromes: do  
508 floral traits predict effective pollinators? *Ecol Lett* 17:388–400.
- 509 Sahli, H. F. and J. K. Conner, 2011. Testing for conflicting and nonadditive selection: floral  
510 adaptation to multiple pollinators through male and female fitness. *Evolution* 65:1457–  
511 1473.
- 512 Silvestro, D., A. Kostikova, G. Litsios, P. B. Pearman, and N. Salamin, 2015. Measurement  
513 errors should always be incorporated in phylogenetic comparative analysis. *Methods Ecol*  
514 *Evol* 9:340–346.
- 515 Skog, L. E., 2012. Gesneriaceae. Pp. 350–364, in P. Acevedo-Rodríguez and M. T. Strong,  
516 eds. Catalogue of seed plants of the west indies, *Smithsonian contributions to botany*,  
517 vol. 98. Smithsonian Institution Scholarly Press, Washington D.C.
- 518 Stebbins, G. L., 1970. Adaptive radiation of reproductive characteristics in angiosperms, I:  
519 Pollination mechanisms. *Annual Review of Ecology and Systematics* 1:307–326.
- 520 Waser, N. M., 1998. Pollination, angiosperm speciation, and the nature of species boundaries.  
521 *Oikos* 82:198–201.

**Table 1:** Number of transitions between the different pollination syndromes according to the ancestral state reconstructions. The estimates are the values obtained on the maximum sum of clade credibility tree (Fig. 1). 95% credible intervals (in brackets) were obtained from the posterior distribution of trees. Ancestral state are in rows.

|                   | bat      | mixed-pollination | hummingbird |
|-------------------|----------|-------------------|-------------|
| bat               | 0 [0, 4] | 0 [0, 1]          | 0 [0, 2]    |
| mixed-pollination | 1 [0, 1] | 11 [4, 18]        | 2 [0, 5]    |
| hummingbird       | 2 [1, 3] | 4 [0, 5]          | 38 [28, 42] |

**Table 2:** Evolutionary model selection and parameter values estimates. The models were fitted on 5000 species trees sampled from the posterior distribution. Median values and 95% credible intervals are reported. Positive  $\Delta AIC$  values indicate support for the OU model and thus the presence of balancing selection. In cases where the 95% credible intervals (numbers in brackets) of the  $\Delta AIC$  is below or includes 0, the parameters for the BM model are given instead of that of the OU.

| <b>PC1 and PC2 (multivariate)</b> |                   |     |                    |                                |                   |
|-----------------------------------|-------------------|-----|--------------------|--------------------------------|-------------------|
| Syndrome                          | $\Delta AIC$      | PC  | $\sigma$           | $\alpha$                       | $\theta$          |
| mixed-pollination                 | -2.4 [-4.8, 0.58] | PC1 | 0.73 [0.53, 1.2]   | –                              | –                 |
|                                   |                   | PC2 | 0.10 [0.067, 0.18] | –                              | –                 |
| hummingbird                       | 14.9 [2.7, 66]    | PC1 | 2.5 [1.2, 149]     | 242 [90, 18955]                | 0.16 [0.15, 0.17] |
|                                   |                   | PC2 | 11 [2.8, 827]      | 1675 [402, $1.2 \times 10^5$ ] | 0.03 [0.03, 0.04] |

  

| <b>PC1 (univariate)</b> |                   |                  |          |          |
|-------------------------|-------------------|------------------|----------|----------|
| Syndrome                | $\Delta AIC$      | $\sigma$         | $\alpha$ | $\theta$ |
| mixed-pollination       | -0.28 [-1.2, 1.6] | 0.72 [0.51, 1.3] | –        | –        |
| hummingbird             | 0.3 [-1.8, 6.0]   | 1.0 [0.74, 1.8]  | –        | –        |

  

| <b>PC2 (univariate)</b> |                   |                   |                                |                      |
|-------------------------|-------------------|-------------------|--------------------------------|----------------------|
| Syndrome                | $\Delta AIC$      | $\sigma$          | $\alpha$                       | $\theta$             |
| mixed-pollination       | -2.0 [-2.0, -0.2] | 0.08 [0.06, 0.12] | –                              | –                    |
| hummingbird             | 14.8 [3.4, 60.7]  | 14.1 [2.4, 2450]  | 1816 [297, $3.1 \times 10^5$ ] | 0.035 [0.032, 0.039] |

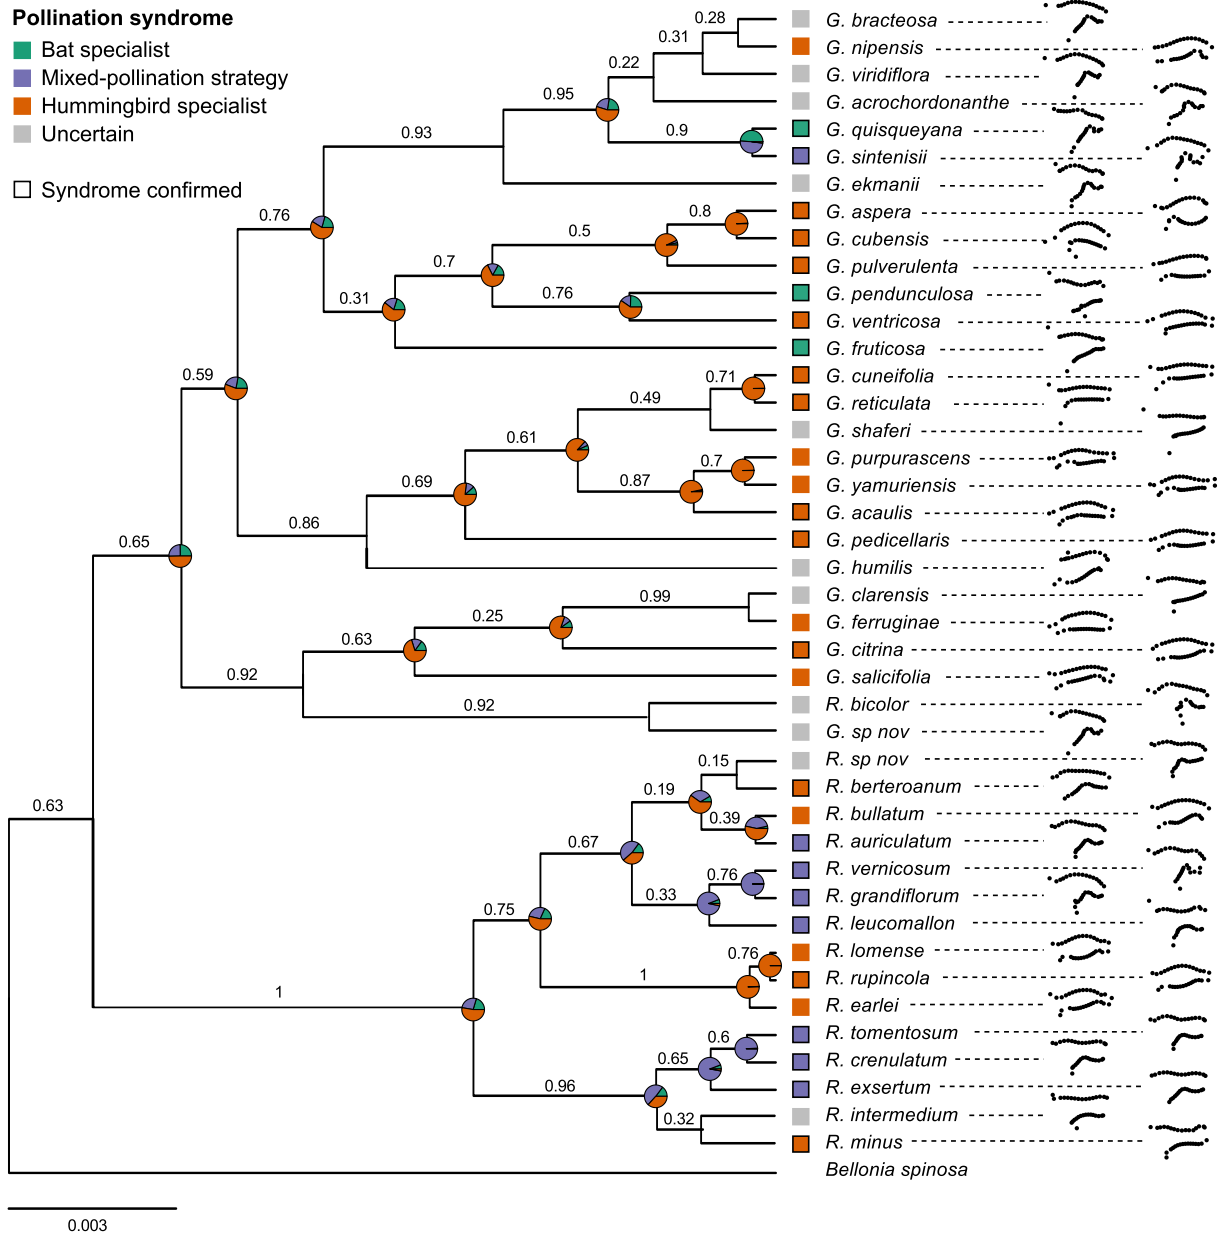

**Figure 1:** Species phylogeny showing mean corolla shapes (after Procrustes analysis). Pollinators are shown with those that have been confirmed indicated by a black contour. Pie charts represent the joint probability of each state at corresponding nodes as estimated by stochastic mapping; root estimates are not shown because they are unreliable Gascuel and Steel (2014). Clade posterior probabilities are shown above branches. Two outgroup taxa from tribes Gesnerieae and Trichosporeae are not shown.

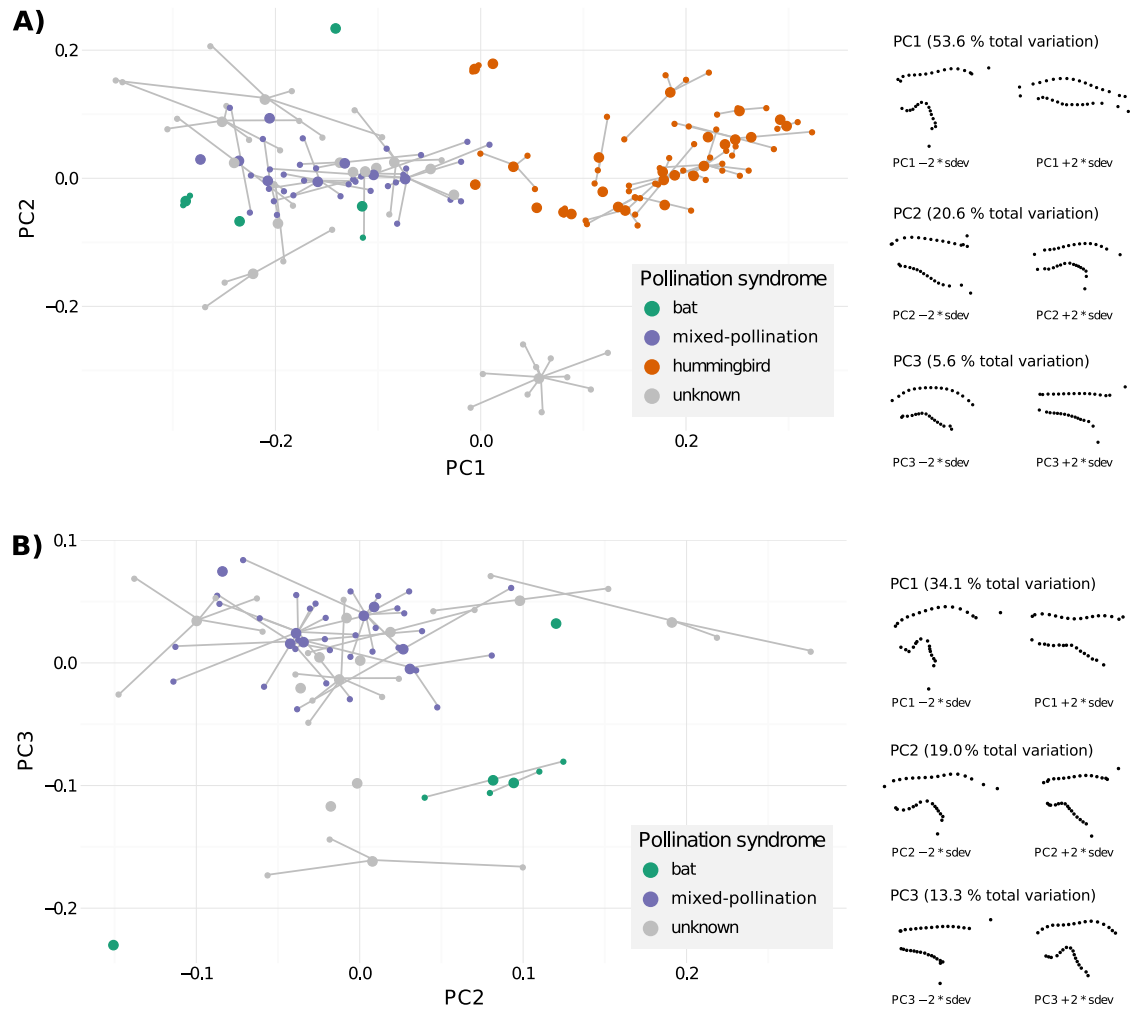

**Figure 2:** Principal component analyses showing the corolla shape morphospace for all species (A) and when excluding *G. humilis* and hummingbird pollinated species (B). The large dots on the plot represent the species means and the individual floral shapes (small dots) are associated with their species mean by gray lines. The corolla shape variation along the first three principal components are shown to the right (plus or minus 2 standard deviation from the mean shape).

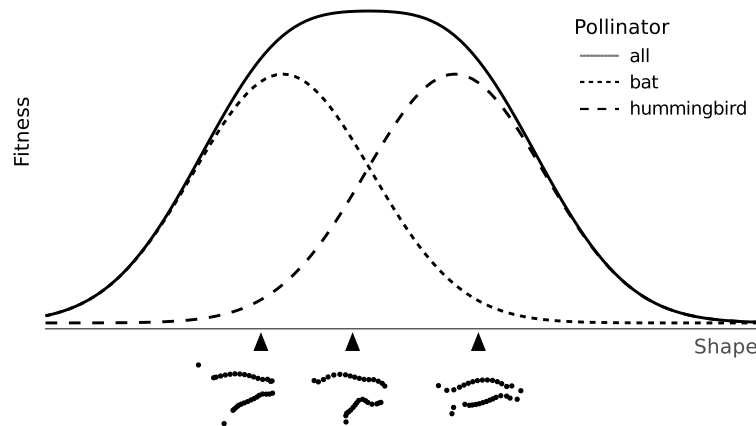

**Figure 3:** Imaginary example demonstrating how the generalist mixed-pollination syndrome might evolve via trade-off effects. The x-axis is a fictitious floral shape vector to illustrate the concept; real fitness landscapes are more likely to be multi-dimensional. Shapes to the left of the axis are better fitted to bat pollination and those to the right to hummingbird pollination. The curves represent the plant fitness for different flower shapes when bats, hummingbirds or both pollinators are present. Floral shapes of the mixed-pollination syndrome, with a constriction at the base of the corolla and a wide opening, have the capacity to be effectively pollinated by both types of pollinators even though their fitness is suboptimal with both bats and hummingbirds. Yet, this mixed-pollination shape could be favoured by selection if both pollinators are present.
